# Supplementary figures and images for: Severe Myocardial Dysfunction after Non-Ischemic Cardiac Arrest: Effectiveness of Percutaneous Assist Devices
Source: MDPI journal article supplement (doi:10.3390/jcm10163623), 2021-08-17

**Figure S1. Flow delivered by the devices**

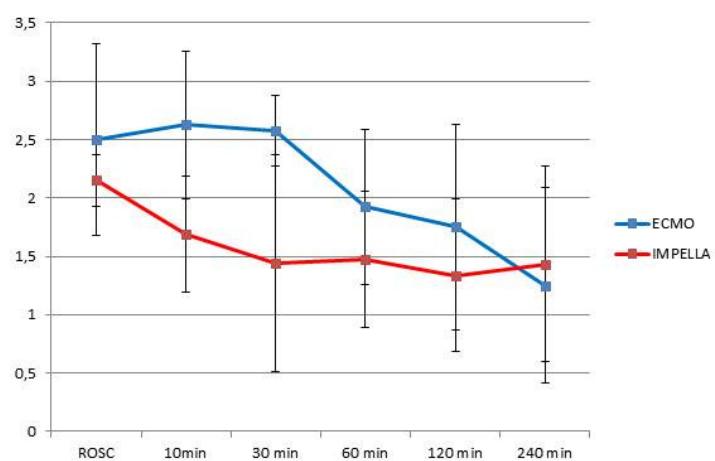

Supplement: s1 [file s1]
